# Supplementary material for: Pituitary stem cells produce paracrine WNT signals to control the expansion of their descendant progenitor cells
Source: eLife journal article supplement (doi:10.7554/elife.59142), 2021-01-05
Supplement: supp [file elife_poa_e59142_Supplementary_file_1.xlsx › elife_poa_e59142_Supplementary_file_1.xlsx]

| REACTOME_SIGNALIN_BY_CONSTITUTIVELY_ACTIVE_EGFR Sox2+ FPK | Sox2- FPK | q value  | Significant  |
|-----------------------------------------------------------|-----------|----------|--------------|
| EGFR                                                      | 34.4035   | 2.2888   | 0.000786 yes |
| PIK3R1                                                    | 12.0958   | 3.53981  | 0.000786 yes |
| NRAS                                                      | 49.9646   | 17.4334  | 0.001429 yes |
| PIK3CA                                                    | 3.1893    | 1.23519  | 0.018811 yes |
| GAB1                                                      | 4.62976   | 1.46717  | 0.026635 yes |
| RPS27A                                                    | 549.666   | 275.551  | 0.055465 yes |
| CBL                                                       | 1.08646   | 0.309349 | 0.074237 yes |
| KRAS                                                      | 4.56905   | 2.61654  | 0.222113 no  |
| PLCG1                                                     | 1.20342   | 0.855801 | 0.733989 no  |
| HSP90AA1                                                  | 207.705   | 182.045  | 0.761419 no  |
| SOS1                                                      | 1.57833   | 1.35593  | 0.776177 no  |
| SHC1                                                      | 8.52419   | 9.18768  | 0.88632 no   |
| HRAS                                                      | 4.82894   | 5.50698  | 0.83772 no   |
| CDC37                                                     | 66.255    | 79.0409  | 0.676387 no  |
| UBA52                                                     | 437.695   | 587.325  | 0.485258 no  |
| GRB2                                                      | 5.6501    | 12.0581  | 0.103568 yes |
| EGF                                                       | 0.695341  | 2.5414   | 0.034334 yes |

### Which?

p14Sox2Pos  
p14Sox2Neg  
p14Sox2Neg  
p14Sox2Neg  
p14Sox2Neg  
p14Sox2Neg
